26 silencing RNA interference (RNAi) and selective breeding of Varroa-resistant bees, is needed  
27 to effectively manage a parasite that threatens global agriculture.

28 Keywords: *Apis mellifera*, *Varroa destructor*, colony losses, resistance, flumethrin, amitraz

## 29 **Introduction**

30 The western honey bee, *Apis mellifera*, plays a critical role in crop pollination across  
31 the globe (Aizen and Harder 2009). Reliance on pollinator-dependent crops has risen over  
32 recent decades (Aizen *et al.* 2019) and there is evidence of pollinator limitation in many fruit  
33 and vegetable crops as honey bee stocks struggle to keep up with demand (Breeze *et al.*  
34 2014, Reilly *et al.* 2020). The loss of pollination services not only threatens food security, but  
35 also poses a significant risk to economies that depend on the international trade of pollinated  
36 crops (Eilers *et al.* 2011, Vanbergen and Insect Pollinators Initiative 2013, Murphy *et al.* 2022).  
37 The deficit between the need for pollinators and the availability of bee colonies is due in part  
38 to a decline in honey bee health and increases in hive mortality rates (Dolezal *et al.* 2019,  
39 Steinhauer *et al.* 2021). Stressors such as parasites, pesticides and disease are recognised  
40 drivers of colony loss (Goulson *et al.* 2015, Di Prisco *et al.* 2016). The most significant threat  
41 to the apiculture industry worldwide is frequently cited as the ectoparasite *Varroa destructor*  
42 (Rosenkranz *et al.* 2010, Traynor *et al.* 2020, Jack and Ellis 2021). This parasite feeds on the  
43 fat body of bees, a tissue crucial to bee health that is involved in immune function, the  
44 detoxification of pesticides and winter survival (Amdam *et al.* 2004, Ramsey *et al.* 2019).  
45 *Varroa* is also a vector for honey bee viruses, particularly the Deformed wing virus (DWV)  
46 (Wilfert *et al.* 2016), which is associated with a wide range of clinical symptoms including  
47 crippled wings, cognitive impairment and reduced lifespan (Dainat *et al.* 2012, Francis *et al.*  
48 2013). Both *Varroa* and DWV are strong predictors of colony collapse over winter (Dainat *et al.*  
49 *et al.* 2012, Francis *et al.* 2013). Colonies that are not treated for *Varroa* typically collapse within  
50 three years (Rosenkranz *et al.* 2010).

51           The most widely used Varroa control methods currently on the market are synthetic or  
52 organic miticides. These chemicals are usually applied as impregnated strips which are placed  
53 within the beehive and left for a period of four to ten weeks. Of the synthetic miticides,  
54 pyrethroid and formamidine based treatments have historically been popular choices for mite  
55 control. Pyrethroids specifically act on voltage-gated sodium channels, prolonging the opening  
56 of channels, causing paralysis and death (Narahashi 2000, Wang *et al.* 2003). Formamidines  
57 are designed to target and stimulate alpha-2 adrenoceptors, interfering with the nervous  
58 system, which can result in a variety of outcomes, including impairment of consciousness and  
59 convulsions (Dekeyser and Downer 1994). Synthetic miticides are selected and developed  
60 based on their ability to control Varroa without killing their host.

61           A key issue with miticides is the development of resistance by Varroa to many products  
62 on the market (Hernández-Rodríguez *et al.* 2021). Resistance to pyrethroid-based treatments  
63 was first reported from Italy around 1991 (Martin 2004), and since then, pyrethroid-resistant  
64 mites have been found in the United Kingdom, Europe, Canada and USA (Martin 2004, Mitton  
65 *et al.* 2022). Mutations have been associated with mite resistance to pyrethroids in Varroa and  
66 other arthropods (González-Cabrera *et al.* 2013, González-Cabrera *et al.* 2016, Millán-Leiva  
67 *et al.* 2021). In Varroa, amino acid substitutions in the voltage-gated sodium channel protein  
68 at position 925 in particular have been observed in a number of mite populations that  
69 demonstrated resistance (Millán-Leiva *et al.* 2021). Incidences of resistance to formamidine-  
70 based Varroa treatments have been less common, although inefficacy has been detected in  
71 some studies (Thompson *et al.* 2002, Kamler *et al.* 2016, Higes *et al.* 2020, Rinkevich 2020,  
72 Hernández-Rodríguez *et al.* 2021). A growing number of treatments appear to be becoming  
73 ineffective against Varroa mites, with a lack of effective alternatives available to replace them.

74           Varroa was first discovered in New Zealand in the year 2000 (Goodwin 2004).  
75 Pyrethroids were the first treatments to be registered for use against Varroa in 2000 and 2001,  
76 followed by formamidine treatments in 2004. As resistance had already been reported in  
77 numerous countries by this time, a study examining miticide efficacy on Varroa populations in

78 New Zealand was conducted in 2003 by Goodwin *et al.* (2005). Their study did not find  
79 sufficient evidence to conclude that mites were resistant to either flumethrin (a pyrethroid-  
80 based treatment) or amitraz (formamidine-based treatment) and beekeepers have continued  
81 to use these treatments to control Varroa.

82 One management tool that has proven useful in identifying the threats to honey bees  
83 has been the establishment of a survey whereby beekeepers can report colony losses each  
84 winter. Colony loss surveys were first implemented in Canada in 2003 following reports of  
85 Varroa resistance to treatments (Currie *et al.* 2010). In the years following, other regions of  
86 the world including the USA, Canada, Europe, Asia, the Middle East and Africa began  
87 conducting surveys in the wake of increased levels of overwintering colony losses  
88 (vanEngelsdorp *et al.* 2008, van der Zee *et al.* 2012, Brodschneider *et al.* 2018). In 2008, a  
89 standardised survey, now known as the “COLOSS” survey, was developed to make colony  
90 loss data comparable internationally (Gray *et al.* 2022). These surveys enable spatial and  
91 temporal analyses of the threats to honey bees. A survey based on the COLOSS  
92 questionnaire was first conducted in New Zealand in 2015 and has been undertaken annually  
93 since (Brown *et al.* 2018). In addition to overall losses, the New Zealand survey has measured  
94 beekeepers’ attributions of losses, including to parasitic Varroa mites and related  
95 complications, since 2017. The annual survey also includes detailed questions on Varroa  
96 monitoring and treatment.

97 The aims of this study were to 1) report the role that Varroa has played in colony losses  
98 in New Zealand according to beekeepers that responded to the survey, 2) describe current  
99 Varroa management strategies practiced by commercial beekeepers and any changes in this  
100 strategy over a five-year period and 3) test for evidence of Varroa resistance to the two most  
101 commonly utilised chemical treatments in New Zealand: flumethrin and amitraz.

## 102 **Materials and Methods**

### 103 *Varroa and colony losses in New Zealand*

104 The New Zealand Colony Loss Survey covers topics related to hive management, such  
105 as the number of colonies lost over winter, beekeepers' attributions of losses (including Varroa  
106 and related complications) and Varroa control methods used. The current study analysed  
107 survey results for the years 2017-2021 only, as "*suspected Varroa and related complications*"  
108 were not included as an attributable cause of losses prior to 2017. In the 2021 survey,  
109 beekeepers were also given the opportunity to provide feedback on the perceived  
110 effectiveness of the treatments they used to combat Varroa, to give insight into the  
111 effectiveness of current treatments and to detect any early signs of developing resistance.

112 New Zealand beekeepers are legally obligated to register their hives under the  
113 Biosecurity Act 1993 (MPI 1993), and all registered beekeepers were invited to participate in  
114 the online colony loss survey. This mandatory registration also allows for the percentage of  
115 beekeepers that participated in the survey to be estimated. In 2017, 2,066 beekeepers  
116 completed the survey, a response rate of 30.9% of all beekeepers nationwide. In the years  
117 following, the number of beekeepers that participated were 3,655 (42.3%), 3,456 (36.7%),  
118 2,863 (32.0%) and 4,355 (49.1%) for the years 2018, 2019, 2020 and 2021, respectively  
119 (Stahlmann-Brown *et al.* 2021). Our investigation into Varroa management strategies differed  
120 from previous work by only focusing on responses from commercial beekeepers only, defined  
121 here as having more than 350 hives at the beginning of winter (according to the definition by  
122 New Zealand's Ministry for Primary Industries (MPI 2020)). These beekeepers manage the  
123 majority of hives in the country and therefore their success in controlling Varroa is of the  
124 greatest economic interest. Loss rates from the survey were calculated using standard  
125 approaches for estimating colony losses (van der Zee *et al.* 2013) as detailed in Stahlmann-  
126 Brown and Robertson (2022). Statistical analyses were conducted in R 4.2.0 (R Development  
127 Core Team 2020). Overall loss rates and corresponding confidence intervals (CI) were  
128 calculated with a quasi-binomial generalised linear model and logit link function. A test of equal

129 or given proportions (“prop.test”) determined if there was a significant change in the overall  
130 loss rates or losses attributed to *Varroa* over the five-year period of 2017-2021.

### 131 *Testing for pesticide resistance in mites*

132 Trials were conducted in April and May of 2022 at Victoria University of Wellington,  
133 Wellington, New Zealand. The testing protocol from Goodwin *et al.* (2005) was followed to  
134 allow for comparison. Analytical standard grade flumethrin (Sigma Aldrich/Merck, New  
135 Zealand) and amitraz (AK Scientific, USA), were diluted in hexane (Sigma Aldrich/Merck, New  
136 Zealand). Flumethrin was tested at 0, 10, 20, 40, 80, 160, 320 and 640 µg/g. Amitraz was  
137 tested at 0, 2, 5, 10, 25, 50, 100, 200 and 400 µg/g. Petri dishes were prepared with the  
138 different concentrations following Goodwin *et al.* (2005) methodology with some minor  
139 modifications, as follows. Fully-refined paraffin wax (58°C melting point, National Candles Ltd.,  
140 New Zealand) was melted in a microwave and 50 mL was poured into wide-mouth, graduated  
141 bottles and weighed. Twenty-five mL of the respective pesticide concentration in hexane was  
142 added to the bottles and left in a hot water bath at 60°C for approximately 8 hours until the  
143 hexane evaporated, and each bottle returned to the original weight. The mixture of paraffin  
144 and pesticide was then swirled and poured into four 35-mm sterile petri dishes (Corning, USA)  
145 to a depth of ~4 mm and kept in a fridge until use.

146 Mites were collected from hives at Victoria University of Wellington that had not been  
147 treated for *Varroa* for six months. The freshly collected mites were counted out into groups of  
148 approximately 20. Each group of mites was transferred to petri-dishes containing the treatment  
149 (either flumethrin or amitraz of a particular concentration, or a control treatment of plain  
150 paraffin), where they were left for one hour. The mites were then transferred to a third dish of  
151 the same size, along with 2-3 bee pupae collected from the same colony as the mites and  
152 placed in an incubator at 32-34°C, with 50% relative humidity (RH) for 48 hours until the  
153 survival assessment (Figure S1, Supplemental material). Analysis of the data was conducted  
154 using SPSS 28 (Akçay 2013). Abbott’s correction was used to account for mite mortality in the

155 controls for both the Goodwin *et al.* (2005) and the 2022 datasets. The adjusted proportion of  
156 dead mites for each study was then fitted using a probit regression model on concentration  
157 (log scale). The adjusted Lethal Concentration at 50% (LC<sub>50</sub>) and associated 95% CIs were  
158 then estimated for the flumethrin and amitraz treatments.

### 159 *Investigating mutations associated with pesticide resistance in mites*

160 We investigated two specific amino acid residue substitutions located on the *Varroa*  
161  *destructor* pyrethroid susceptible sodium channel (Na) gene (GenBank accession number  
162 KC152655), at nucleotide positions 1689-1691 (residue substitution M918L) (Rinkevich *et al.*  
163 2013) and 1710-1712 (residue substitution L925V/M/I) known to be associated with flumethrin  
164 resistance in *Varroa* (González-Cabrera *et al.* 2013, González-Cabrera *et al.* 2016, Millán-  
165 Leiva *et al.* 2021). We aligned *Varroa* RNA-Seq reads obtained in another study (Lester *et al.*  
166 2022) onto the KC152655 FASTA file using HISAT 2.0 with default parameters (Kim *et al.*  
167 2015). The resulting BAM files were visually inspected in Geneious 11.1.5 (Kearse *et al.* 2012)  
168 to check for nucleotide polymorphisms.

169 In order to further investigate the presence of the *Varroa destructor* pyrethroid  
170 susceptible sodium channel (Na) gene (GenBank accession number KC152655) for mutations  
171 at positions 1710-1712, 10 mite samples were taken from locations throughout the country,  
172 including mites from the experimental hives in Wellington (Supp. Table 1, Supplemental  
173 material). Each individual mite was placed in a 2 mL microtube (Sarstedt, Germany). Five 3.2  
174 mm stainless steel beads (Next Advance Inc., USA), 500 µL of GENEzol DNA Plant Reagent  
175 (Geneaid Biotech, Taiwan) and 2.5 µL of β-mercaptoethanol (Sigma Aldrich, USA) were added  
176 to the tube. Samples were homogenised for one cycle of 20 s each at 8,000 rpm in a Precellys  
177 Evolution homogeniser (Bertin, France). DNA and RNA was simultaneously isolated with a  
178 24:1 chloroform–isoamyl alcohol mixture (BioUltra, Sigma Aldrich, USA), followed by  
179 isopropanol precipitation (Sigma Aldrich, USA), and an ethanol purification step (VWR  
180 Chemicals, UK). DNA/RNA was then eluted in 15 µL of nuclease-free water (Ambion, Life

181 Technologies, USA), quantified using a NP80 NanoPhotometer (Implen, Germany) and kept  
182 at -80°C until use.

183 RNA samples (70 ng) were prepared for PCR by reverse transcription in 10 µL  
184 reactions using qScript cDNA SuperMix (Quantabio, USA). Two PCR assays were conducted  
185 on each sample. The first used primers Vd\_L925V\_F (5'-CCAAGTCATGGCCAACGTT-3')  
186 and Vd\_L925\_R (5'-AAGATGATAATTCCTCAACACAAAGG-3'), which generated 97 base pair  
187 products and were used to identify mutations at positions 1710-1712 (amino acid residue 925),  
188 developed by González-Cabrera *et al.* (2013). A second set of primers, Vd\_general\_407\_F  
189 (5' -GGTCTGGAAGGCGTACAAGG-3') and Vd\_general\_407\_R (5'-  
190 TTGAGTACGACCAGGTTGCC-3'), amplified a larger product (406-407 base pairs), and were  
191 used to screen for mutations across a longer stretch of the gene. Reactions were set up with  
192 primers at 0.4 µM, 14 ng cDNA, 7.5 µL MyTaq Red (Bioline/Meridian Bioscience, USA), and  
193 water to a final volume of 15 µL. Run conditions were as follows: 95 °C for 1 min and then 35  
194 cycles of 95 °C (15 s), 60 °C (15 s) and 72 °C (10 s). PCR products were then resolved by 2%  
195 agarose gel electrophoresis (100 V, 30 min), and visualised using SYBR Safe DNA gel stain  
196 (Invitrogen/ThermoFisher Scientific, USA). Products were then prepared for sequencing using  
197 ExoSAP-IT PCR Product Cleanup Reagent (Applied Biosystems/ThermoFisher Scientific,  
198 USA) following manufacturer guidelines. Sequencing was performed on an ABI 3130x1  
199 Genetic Analyzer (Applied Biosystems, USA) at Massey Genome Service (Palmerston North,  
200 New Zealand). We visually inspected and aligned the forward and reverse gene sequences of  
201 the same mite using the default alignment algorithm implemented in Geneious Prime 2023.0.4  
202 (<http://www.geneious.com>).

## 203 **Results**

### 204 *Varroa and colony losses in New Zealand*

205 The first goal of this study was to report losses attributed to *Varroa* based on the  
206 responses of beekeepers in the New Zealand Colony Loss Survey. Total colony loss rates



207 have increased significantly over the last five years ( $\chi^2 = 3622.6$ ,  $df = 4$ ,  $P < 0.0001$ ), from  
208 9.70% [95% CI: 9.36% - 10.04%] in 2017 to 13.59% [95% CI: 13.23% - 14.01%] in 2021  
209 (Figure 1). Among beekeepers who lost colonies, the proportion of losses attributed to Varroa  
210 has also increased significantly over the last five years ( $\chi^2 = 8215.5$ ,  $df = 4$ ,  $P < 0.0001$ ), from  
211 16.9% [95% CI: 15.3% - 18.1%] in 2017 to 38.9% [95% CI: 37.7% - 40.0%] in 2021 (Fig. 1).  
212 According to beekeepers that participated in the questionnaire survey in 2022, Varroa was the  
213 main driver of colony loss over winter 2021.

214 To find possible explanations for the observed increase in overall colony losses  
215 attributed to Varroa, the management strategies of commercial beekeepers were investigated.  
216 According to beekeepers that participated in the colony loss survey, amitraz and flumethrin  
217 were the two most commonly utilised Varroa treatments in New Zealand each of the five years  
218 analysed. Amitraz was the most popular choice, used annually by 85-92% of commercial  
219 beekeepers over the 2017-2021 period (Table 1). Flumethrin was used annually by 68-80%  
220 of commercial beekeepers as part of their hive treatment against Varroa over that time (Table  
221 1). The majority of commercial beekeepers used both amitraz and flumethrin in the same year  
222 (63-75%). The other common control treatments utilised were oxalic and formic acid, which  
223 are organic miticides. The use of oxalic acid has increased steadily over the five year period,  
224 with 41.8% of beekeepers reporting its use against Varroa in 2021, whereas in 2017 only  
225 19.5% used oxalic acid (Table 1). Formic acid use has fluctuated year to year, with 11.5-19.1%  
226 of beekeepers applying it to hives annually.

227 Of the beekeepers that used amitraz treatments in the 2020/2021 season, 27.6% found  
228 the treatment to be “completely successful” against Varroa, with 64.3% finding it to be “mostly  
229 successful” (Table 2). Only 8.1% reported amitraz to be either “partly” or “not at all” successful.  
230 For flumethrin, 17.9% found the treatment to be completely successful, 63.4% thought it was  
231 mostly successful and 18.8% of beekeepers reported the pyrethroid-based control to be only  
232 partly or not at all successful in controlling Varroa.

233 *Testing for pesticide resistance in mites*

234 The experiment testing for pesticide resistance in New Zealand populations of mites found a  
235 much higher concentration of flumethrin was required to kill mites compared to the  
236 concentration required in the 2003 study (Goodwin *et al.* 2005). The adjusted LC<sub>50</sub> value for  
237 flumethrin in 2003 was 12 µg/g [95% CI = 8 - 17] , whereas the adjusted LC<sub>50</sub> value in 2022  
238 had increased to 156 µg/g [95% CI = 115 - 217]. The concentration of flumethrin required to  
239 reach an average mite mortality of 50% in 2022 was a 12 fold-change higher compared to  
240 what was observed in 2003 (Figure 2). For amitraz, the adjusted LC<sub>50</sub> value was 110 µg/g  
241 [95% CI = 39 – 217] in 2003 and decreased to 12 µg/g [95% CI = 10-16] in 2022. A similar  
242 concentration of amitraz was required to achieve 50% average mortality in both studies (Figure  
243 2). We note that in the 2003 experiment there was high variability in the proportion of mites  
244 that died for the flumethrin treatment. For example, at a concentration of 1 µg/g, Goodwin *et*  
245 *al.* (2005) observed mortality ranging from 0-99.7% in different replicates. This level of  
246 variability was not observed in the 2022 trial. It is also worth noting that the amitraz treatment  
247 in the 2003 experiment was unable to achieve an average mortality rate above 65% at any  
248 concentration, whereas 100% mortality was achieved in the 2022 study.

249 *Investigating mutations associated with pesticide resistance in mites*

250 RNA-Seq data from a previous study comprised of Varroa samples from throughout  
251 New Zealand (Lester *et al.* 2022) was examined for gene mutations associated with pesticide  
252 resistance. None of the reads that mapped to the Varroa pyrethroid susceptible sodium  
253 channel gene (0-50 reads per sample, average 16.5) showed residue substitutions known to  
254 be associated with flumethrin resistance at amino acid positions 918 and 925. Similarly, in the  
255 Sanger sequencing analysis, the analysis of the 10 individual mite samples from across New  
256 Zealand showed no evidence of mutations in nucleotides 1710-1712 (amino acid position 925)  
257 (Supp. Table 1, Supplemental material). All mites presented the wild-type leucine residue at  
258 this position.

## 259 Discussion

260 Colony loss rates over winter rose significantly in New Zealand between 2017 and  
261 2021. During this same time period, attributions of losses to Varroa increased sharply, with  
262 beekeepers reporting this parasite to be the biggest driver of colony loss during winter 2021.  
263 These findings are unsurprising as Varroa has also been found to be the main cause of winter  
264 colony losses for countries such as the United States (Seitz *et al.* 2016, Kulhanek *et al.* 2017,  
265 Steinhauer *et al.* 2021). As honey exports are of great economic value in New Zealand, worth  
266 \$482 million in 2021 (Stahlmann-Brown *et al.* 2022b), it would be beneficial for the apiculture  
267 industry to better understand why colony losses to Varroa have increased. Whilst the majority  
268 of commercial beekeepers were satisfied with the efficacy of flumethrin, approximately 19%  
269 of beekeepers in the survey indicated that flumethrin had failed to successfully control Varroa  
270 in their hives. Failure to control Varroa is consistent with emerging miticide resistance,  
271 although Stahlmann-Brown and Robertson (2022) report that significantly underdosing  
272 flumethrin was a common practice by New Zealand beekeepers during the 2020-2021 season.  
273 Even so, some commercial beekeepers communicated with the study authors that they felt  
274 flumethrin had become less effective in recent years; many of these beekeepers reported that  
275 they followed flumethrin treatments with other treatments such as oxalic acid. Indeed,  
276 treatment with oxalic acid has risen during the study period, and it is noted that oxalic acid can  
277 be applied during the honey flow if a spring treatment fails. However, oxalic acid may often  
278 not be ideal either as sub-lethal stress effects to honey bees have been reported (Gunes *et*  
279 *al.* 2017, Rademacher *et al.* 2017).

280 Our experiments testing for flumethrin resistance in New Zealand Varroa populations  
281 found evidence of resistance when compared to the study conducted by Goodwin *et al.* (2005).  
282 The adjusted LC<sub>50</sub> for flumethrin (156µg/g) was found to be 13 times what it was in 2003  
283 (12µg/g). However, issues with the variability of results from 2003 mean that a degree of  
284 caution is needed when drawing comparisons between the two studies. There was far greater  
285 variation in mite mortality in the 2003 study than was observed in 2022, particularly in the

286 replicates for the lower concentrations of flumethrin. Preliminary data for the 2022 study found  
287 subtle differences in temperature and humidity affected mortality, which is a possible  
288 explanation for the variation observed in the 2003 study. In the 2022 trials, mortality rates were  
289 consistent throughout.

290 The methodology used by Goodwin *et al.* (2005) was based on a study conducted by  
291 Milani (1995) assessing the susceptibility of *Varroa* to flumethrin, fluvalinate and acrinathrin in  
292 Italy. This study also dissolved chemicals into paraffin wax, making their results comparable  
293 to the current study. For the flumethrin trials, the LC<sub>50</sub> values observed for two non-resistant  
294 mite populations in the Italian study were 0.28 µg/g and 0.36 µg/g, substantially lower than the  
295 LC<sub>50</sub> of 156 µg/g we observed in 2022. Additionally, the LC<sub>50</sub> values in our current study were  
296 seven times greater than the LC<sub>50</sub> values (11.4 µg/g and 20.5 µg/g) for the two flumethrin-  
297 resistant *Varroa* populations in Italy (Milani 1995). This difference further suggests that *Varroa*  
298 populations in New Zealand are likely to have developed a degree of resistance to flumethrin.

299 In contrast, trials assessing the efficacy of amitraz found no evidence of mites  
300 developing resistance since 2003. In fact, the estimated LC<sub>50</sub> value for amitraz in the current  
301 study (12 µg/g) was much lower than in 2003 (110 µg/g, Goodwin *et al.* (2005)). The apparent  
302 drop in LC<sub>50</sub> value is likely not due to mites becoming more susceptible to the treatment, but  
303 was likely due to issues with the 2003 trials which led to the unexpected survival of mites at  
304 higher concentrations of amitraz. In 2003 the average mite mortality rate did not exceed 65%,  
305 even for the highest concentration of 300 µg/g, which far exceeds the maximum concentration  
306 tested in other studies that were able to achieve 100% mortality (Thompson *et al.* 2002, Maggi  
307 *et al.* 2008). At the time, it was suggested that this unexpected result was due to the chemical  
308 not being sufficiently mixed into the wax. It may be possible that the mites in Goodwin *et al.*  
309 (2005) had inconsistent exposure to the pesticide, or that there were other methodological  
310 issues with their setup. Their study, however, represents the best available data we have for  
311 comparison. Whilst there is some question about the amitraz results in 2003, the LC<sub>50</sub> in 2022

312 suggests that amitraz is at least as effective as it was, so we are less concerned about the  
313 efficacy of this pesticide than we are for flumethrin.

314         The experiment conducted by Milani (1995) did not test for amitraz resistance, and  
315 other published studies of resistance to this chemical used different methodologies such as  
316 direct exposure of the mites to treatment strips or vials of evaporated solution rather than  
317 amitraz-impregnated paraffin wax (Milani 1995, Thompson *et al.* 2002, Maggi *et al.* 2008).  
318 This prevents us from drawing comparisons to other findings but does provide a baseline for  
319 future studies. Examining the feedback from beekeepers that completed the New Zealand  
320 Colony Loss Survey, ~28% found amitraz to be completely successful in treating *Varroa*, and  
321 less than 10% found amitraz to be partly successful or not at all successful. Amitraz was thus  
322 considered more effective than flumethrin by commercial New Zealand beekeepers. It remains  
323 possible that undetected resistance to amitraz is developing in New Zealand mite populations  
324 as there has been evidence of resistance in other countries (Kamler *et al.* 2016, Almecija *et*  
325 *al.* 2020, Rinkevich 2020). However, for the most part, amitraz seems to still be a popular and  
326 effective treatment against *Varroa* in many countries, even after decades of use (Ferland *et*  
327 *al.* 2021, Hernández-Rodríguez *et al.* 2021).

328         Molecular analyses conducted on the pyrethroid-susceptible sodium channel gene in  
329 *Varroa* found no evidence of mutations known to be associated with flumethrin resistance.  
330 This result was surprising as numerous studies on *Varroa* populations with known resistance  
331 to pyrethroids have been observed to possess mutations within this gene (González-Cabrera  
332 *et al.* 2013, González-Cabrera *et al.* 2018). Evidence suggests that the resistance of *Varroa*  
333 to pyrethroids has only evolved once or twice, initially arising in mite populations from Italy  
334 before dispersing to other regions via the movement of bee colonies (Martin 2004, Mitton *et*  
335 *al.* 2022). Mitochondrial gene analysis of *Varroa* indicate only one introduction of this parasite  
336 into New Zealand (Lester *et al.* 2022). It is therefore likely that the *Varroa* introduced to New  
337 Zealand did not already possess known pyrethroid-resistant mutations. However, *Varroa* in  
338 New Zealand may exhibit novel mutations that would similarly confer flumethrin resistance.

339 Although further research is needed, the findings of our trials, in conjunction with reports from  
340 beekeepers, suggest mites may be developing resistance to one of the most popular Varroa  
341 treatments in New Zealand.

342 The high level of inbreeding involved in Varroa reproduction and haplo-diploid sex  
343 determination allows for the rapid fixation of beneficial mutations in a population (Beaurepaire  
344 *et al.* 2017, González-Cabrera *et al.* 2018). This ability of resistant genes to spread swiftly  
345 through a mite population is why it is so important to detect and attempt to mitigate miticide  
346 resistance early. The development of resistance to chemical treatments by Varroa highlights  
347 how crucial it is to develop new control strategies against Varroa. The detrimental effects these  
348 miticides have on the honey bees themselves are an additional motivator for new management  
349 approaches (Tihelka 2018). One new strategy currently being investigated is the breeding of  
350 Varroa resistant traits in honey bees, such as hygienic behaviour, grooming and shorter brood  
351 development times (Spivak and Gilliam 1998, van Alphen and Fernhout 2020). These  
352 approaches may be more sustainable than pesticides; however, there have been challenges  
353 in attempts to maintain mite resistant traits within bee populations due to the heritability of  
354 these traits, genetic variability within hives and a poor understanding of the combination of  
355 traits required to achieve natural resistance (Mondet *et al.* 2020). Another strategy currently  
356 under development which shows more promise is the utilisation of RNA interference  
357 technology (RNAi) against Varroa mites (Garbian *et al.* 2012). This method has been observed  
358 to reduce mite populations (Garbian *et al.* 2012, Huang *et al.* 2019) and is thought to be  
359 species-specific to Varroa, likely making it harmless to honey bees and other non-target  
360 species (Tan *et al.* 2016, Krishnan *et al.* 2021).

361 Current management strategies are providing a degree of protection for honey bee  
362 populations. However, there is a need for resistance management to ensure chemicals  
363 including flumethrin remain effective. Alternating mite control treatments helps prevent the  
364 development of resistance and is a management strategy that the majority of commercial  
365 beekeepers in New Zealand utilise according to the findings of our study. There is still concern

366 that not all beekeepers are practicing correct resistance management, as 13% of beekeepers  
367 that participated in the 2021 survey (which included hobbyists) reported solely using flumethrin  
368 to treat for Varroa (Stahlmann-Brown *et al.* 2022a). The ability of mites to develop resistance  
369 to chemical treatments highlights the need for more effective Varroa control methods to protect  
370 honey bees, and to help prevent severe economic losses and threats to food security globally.

371

## 372 **Funding**

373 This work was supported by Victoria University of Wellington. The New Zealand Colony Loss  
374 Survey was funded by the Ministry for Primary Industries, New Zealand, under contract  
375 numbers 17392, 19063, 20400, and 32866.

## 376 **Data Availability Statement**

377 Data from the New Zealand Colony Loss Survey are not publicly available due to privacy  
378 concerns and potential commercial sensitivities. Data from the experiments testing for  
379 chemical resistance presented in this study is available on request from the corresponding  
380 author.

## 381 **Informed Consent Statement**

382 The New Zealand Colony Loss Survey undergoes an annual social ethics review by Manaaki  
383 Whenua — Landcare Research following guidelines of the Code of Ethics developed by the  
384 New Zealand Association of Social Science Researchers.

## 385 **Disclosure statement**

386 The authors report there are no competing interests to declare.

## 387 **ORCID**

388 *Rose McGruddy*: <https://orcid.org/0000-0003-3247-6161>

389 *Mariana Bulgarella*: <https://orcid.org/0000-0002-7582-8529>

390 *Antoine Felden*: <https://orcid.org/0000-0002-8499-0739>

391 *James W. Baty*: <https://orcid.org/0000-0002-7961-3234>

392 *Philip Stahlmann-Brown*: <https://orcid.org/0000-0003-4310-1103>

393 *Philip J. Lester*: <https://orcid.org/0000-0002-1801-5687>

394



395

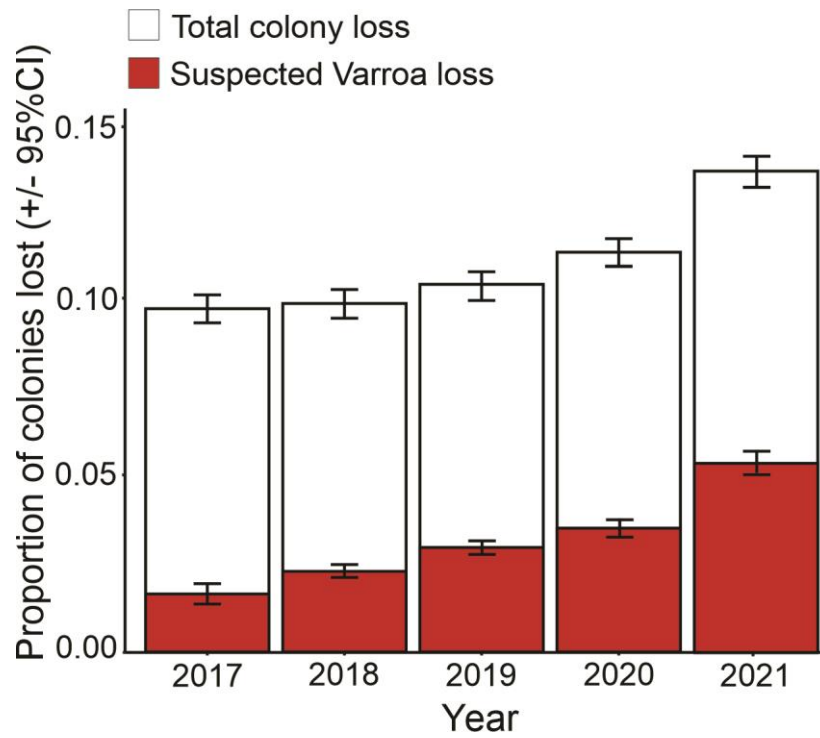

Figure 1. Bar graph depicting the proportion of total colonies lost ( $\pm$  95% CI) and colonies that beekeepers suspected were lost due to Varroa ( $\pm$  95% CI) for the years 2017-2021 in New Zealand. Results are based on reports from all beekeepers that participated in the annual New Zealand colony loss survey. The number of bee colonies reported on each year ranged between 238244 -379862.

Table 1. The most commonly utilised chemical treatments for Varroa as reported by commercial beekeepers in the annual colony loss survey in New Zealand from 2017-2021. The category “Other” contains control methods that aren’t already listed, such as thymol, fogging, drone brood removal and hyperthermia.

| <b>Varroa treatment</b> | <b>2017</b> | <b>2018</b> | <b>2019</b> | <b>2020</b> | <b>2021</b> |
|-------------------------|-------------|-------------|-------------|-------------|-------------|
| Amitraz                 | 91.6%       | 86.50%      | 91.2%       | 90.4%       | 85.1%       |
| Flumethrin              | 80.5%       | 76.0%       | 68.1%       | 70.2%       | 78.0%       |
| Oxalic acid             | 19.5%       | 26.90%      | 34.1%       | 34.0%       | 41.8%       |
| Formic acid             | 13.5%       | 11.50%      | 13.2%       | 11.7%       | 19.1%       |
| Other                   | 38.3%       | 28.80%      | 24.1%       | 17.0%       | 19.1%       |
| No chemical treatment   | 0.00%       | 0.03%       | 0.0%        | 0.0%        | 0.02%       |

Table 2. Efficacy of flumethrin and amitraz, the two most commonly utilised chemical treatments for Varroa, as reported by commercial beekeepers in the annual colony loss survey in New Zealand in 2021. Efficacy in controlling Varroa was categorised as either “completely successful”, “mostly successful”, “partly successful” or “not at all successful”. The responses are displayed as a proportion of all commercial beekeepers that reported using that chemical.

| <b>Varroa treatment</b> | <b>Completely successful</b> | <b>Mostly successful</b> | <b>Partly successful</b> | <b>Not at all successful</b> |
|-------------------------|------------------------------|--------------------------|--------------------------|------------------------------|
| Amitraz                 | 27.6%                        | 64.3%                    | 6.1%                     | 2.0%                         |
| Flumethrin              | 17.9%                        | 63.4%                    | 16.1%                    | 2.7%                         |

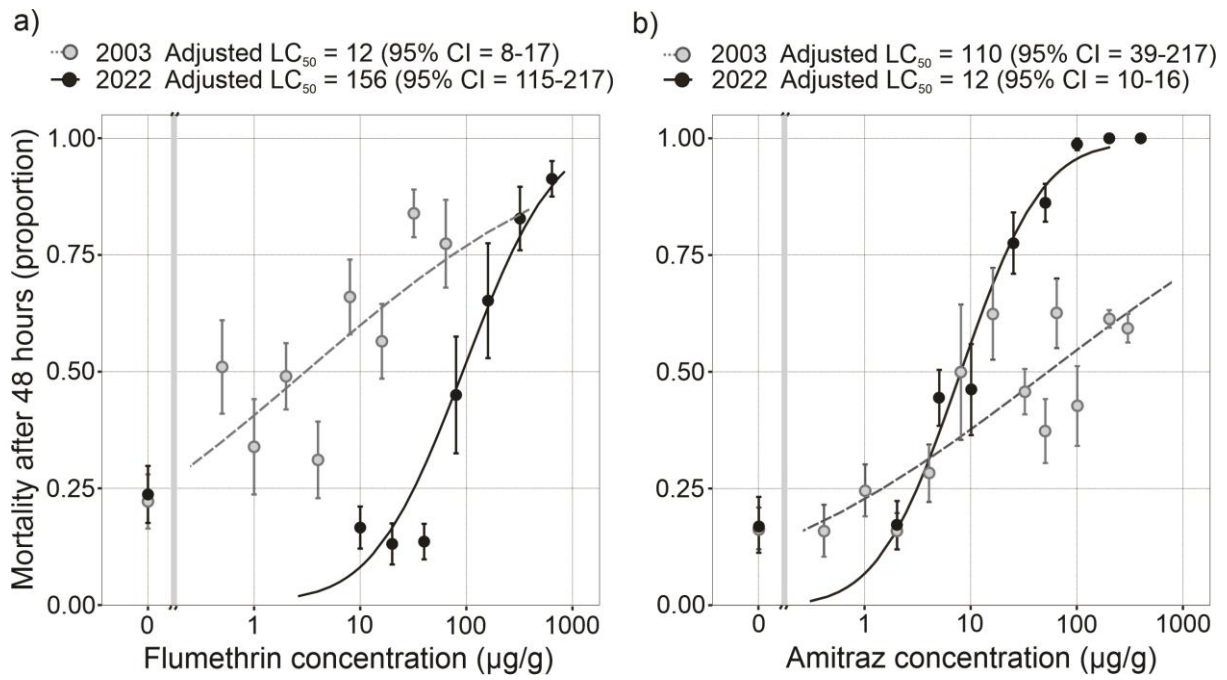

Figure 2. Comparison of the average proportion ( $\pm 1$  SE) of *Varroa destructor* killed at each chemical concentration in 2003 (Goodwin et al. 2005) and the current study for a) flumethrin and b) amitraz. The adjusted  $\text{LC}_{50}$  value for flumethrin in 2003 was 12  $\mu\text{g/g}$  [95% CI = 8 - 17]. The adjusted  $\text{LC}_{50}$  value in 2022 was 156  $\mu\text{g/g}$  [95% CI = 115 - 217]. For amitraz, the adjusted  $\text{LC}_{50}$  value was 110  $\mu\text{g/g}$  in 2003 [95% CI 39 – 217] and 12  $\mu\text{g/g}$  [95% CI = 10-16] in 2022.

## References

- 396 **Aizen, M. A., and L. D. Harder. 2009.** The global stock of domesticated honey bees is growing slower  
397 than agricultural demand for pollination. *Current Biology* 19(11): 915-918.
- 398 **Aizen, M. A., S. Aguiar, J. C. Biesmeijer, L. A. Garibaldi, D. W. Inouye, C. Jung, D. J. Martins, R.**  
399 **Medel, C. L. Morales, and H. Ngo. 2019.** Global agricultural productivity is threatened by  
400 increasing pollinator dependence without a parallel increase in crop diversification. *Global*  
401 *Change Biology* 25(10): 3516-3527.
- 402 **Akçay, A. 2013.** The calculation of LD50 using probit analysis. *Faseb Journal* 27(S1): 1217-1228.
- 403 **Almecija, G., B. Poirot, P. Cochard, and C. Suppo. 2020.** Inventory of *Varroa destructor* susceptibility  
404 to amitraz and tau-fluvalinate in France. *Experimental and applied acarology* 82(1): 1-16  
405 doi:10.1007/s10493-020-00535-w.
- 406 **Amdam, G. V., K. Hartfelder, K. Norberg, A. Hagen, and S. W. Omholt. 2004.** Altered physiology in  
407 worker honey bees (Hymenoptera: Apidae) infested with the mite *Varroa destructor* (Acari:  
408 Varroidae): a factor in colony loss during overwintering? *Journal of economic entomology* 97(3):  
409 741-747.
- 410 **Beaurepaire, A. L., K. J. Krieger, and R. F. Moritz. 2017.** Seasonal cycle of inbreeding and  
411 recombination of the parasitic mite *Varroa destructor* in honeybee colonies and its implications  
412 for the selection of acaricide resistance. *Infection, Genetics and Evolution* 50: 49-54.
- 413 **Breeze, T. D., B. E. Vaissière, R. Bommarco, T. Petanidou, N. Seraphides, L. Kozák, J. Scheper,**  
414 **J. C. Biesmeijer, D. Kleijn, and S. Gyldenkærne. 2014.** Agricultural policies exacerbate  
415 honeybee pollination service supply-demand mismatches across Europe. *Plos One* 9(1):  
416 e82996 doi:10.1371/journal.pone.0082996.
- 417 **Brodschneider, R., A. Gray, N. Adjlane, A. Ballis, V. Brusbardis, J. D. Charriere, R. Chlebo, M. F.**  
418 **Coffey, B. Dahle, D. C. de Graaf, M. M. Drazic, G. Evans, M. Fedoriak, I. Forsythe, A.**  
419 **Gregorc, U. Grzeda, A. Hetzroni, L. Kauko, P. Kristiansen, M. Martikkala, R. Martin-**  
420 **Hernandez, C. A. Medina-Flores, F. Mutinelli, A. Raudmets, V. A. Ryzhikov, N. Simon-**  
421 **Delso, J. Stevanovic, A. Uzunov, F. Vejsnaes, S. Wohl, M. Zammit-Mangion, and J.**  
422 **Danihlik. 2018.** Multi-country loss rates of honey bee colonies during winter 2016/2017 from  
423 the COLOSS survey. *Journal of Apicultural Research* 57(3): 452-457.

- 424 **Brown, P., L. E. Newstrom-Lloyd, B. J. Foster, P. H. Badger, and J. A. McLean. 2018.** Winter 2016  
425 honey bee colony losses in New Zealand. *Journal of Apicultural Research* 57(2): 278-291.
- 426 **Currie, R. W., S. F. Pernal, and E. Guzmán-Novoa. 2010.** Honey bee colony losses in Canada.  
427 *Journal of Apicultural Research* 49(1): 104-106.
- 428 **Dainat, B., J. D. Evans, Y. P. Chen, L. Gauthier, and P. Neumann. 2012.** Predictive markers of honey  
429 bee colony collapse. *Plos One* 7(2): e32151 doi:10.1371/ journal.pone.0032151.
- 430 **Dekeyser, M. A., and R. G. Downer. 1994.** Biochemical and physiological targets for miticides.  
431 *Pesticide science* 40(2): 85-101.
- 432 **Di Prisco, G., D. Annoscia, M. Margiotta, R. Ferrara, P. Varricchio, V. Zanni, E. Caprio, F. Nazzi,  
433 and F. Pennacchio. 2016.** A mutualistic symbiosis between a parasitic mite and a pathogenic  
434 virus undermines honey bee immunity and health. *Proceedings of the National Academy of  
435 Sciences* 113(12): 3203-3208.
- 436 **Dolezal, A. G., J. Carrillo-Tripp, T. M. Judd, W. Allen Miller, B. C. Bonning, and A. L. Toth. 2019.**  
437 Interacting stressors matter: diet quality and virus infection in honeybee health. *Royal Society  
438 open science* 6(2): 181803 doi:10.1098/rsos.181803.
- 439 **Eilers, E. J., C. Kremen, S. Smith Greenleaf, A. K. Garber, and A.-M. Klein. 2011.** Contribution of  
440 pollinator-mediated crops to nutrients in the human food supply. *Plos One* 6(6): e21363  
441 doi:10.1371/journal.pone.0021363.
- 442 **Ferland, J., M. Nasr, G. Wilson, C. Jordan, M. Kempers, P. Kozak, R. Lafreniere, C. Maund, S.  
443 Pernal, and J. Sproule.** Canadian Association of Professional Apiculturists statement on  
444 honey bee wintering losses in Canada (2021) Available at:  
445 <https://capabees.com/shared/CAPA-Statement-on-Colony-Losses-2021-2022-fv>. (Accessed  
446 30 November 2022)
- 447 **Francis, R. M., S. L. Nielsen, and P. Kryger. 2013.** *Varroa*-virus interaction in collapsing honey bee  
448 colonies. *Plos One* 8(3): e57540 doi:10.1371/ journal.pone.0057540.
- 449 **Garbian, Y., E. Maori, H. Kalev, S. Shafir, and I. Sela. 2012.** Bidirectional transfer of RNAi between  
450 honey bee and *Varroa destructor*. *Varroa* gene silencing reduces *Varroa* population. *PLOS  
451 Pathogens* 8(12): e1003035 doi:10.1371/journal.ppat.1003035.

- 452 **González-Cabrera, J., T. E. Davies, L. M. Field, P. J. Kennedy, and M. S. Williamson. 2013.** An  
453 amino acid substitution (L925V) associated with resistance to pyrethroids in *Varroa destructor*.  
454 Plos One 8(12): e82941 doi:10.1371/journal.pone.0082941.
- 455 **González-Cabrera, J., S. Rodríguez-Vargas, T. E. Davies, L. M. Field, D. Schmehl, J. D. Ellis, K.**  
456 **Krieger, and M. S. Williamson. 2016.** Novel mutations in the voltage-gated sodium channel  
457 of pyrethroid-resistant *Varroa destructor* populations from the Southeastern USA. Plos One  
458 11(5): e0155332. doi:10.1371/journal.pone.0155332.
- 459 **González-Cabrera, J., H. Bumann, S. Rodríguez-Vargas, P. J. Kennedy, K. Krieger, G. Altreuther,**  
460 **A. Hertel, G. Hertlein, R. Nauen, and M. S. Williamson. 2018.** A single mutation is driving  
461 resistance to pyrethroids in European populations of the parasitic mite, *Varroa destructor*.  
462 Journal of Pest Science 91(3): 1137-1144.
- 463 **Goodwin, R., M. Taylor, H. McBrydie, and H. Cox. 2005.** Base levels of resistance to common control  
464 compounds by a New Zealand population of *Varroa destructor*. New Zealand Journal of Crop  
465 and Horticultural Science 33(4): 347-352.
- 466 **Goodwin, R. M. 2004.** Introduction and spread of varroa in New Zealand. Bee World 85(2): 26-28.
- 467 **Goulson, D., E. Nicholls, C. Botías, and E. L. Rotheray. 2015.** Bee declines driven by combined  
468 stress from parasites, pesticides, and lack of flowers. Science 347(6229): 1255957  
469 doi:10.1126/science.1255957.
- 470 **Gray, A., A. Nouredine, A. Arab, A. Ballis, V. Brusbardis, A. Bugeja Douglas, L. Cadahía, J.-D.**  
471 **Charrière, R. Chlebo, and M. F. Coffey. 2022.** Honey bee colony loss rates in 37 countries  
472 using the COLOSS survey for winter 2019–2020: the combined effects of operation size,  
473 migration and queen replacement. Journal of Apicultural Research 62(2): 1-7  
474 doi:10.1080/00218839.2022.2113329.
- 475 **Gunes, N., L. Aydın, D. Belenli, J. M. Hranitz, S. Mengilig, and S. Selova. 2017.** Stress responses  
476 of honey bees to organic acid and essential oil treatments against varroa mites. Journal of  
477 Apicultural Research 56(2): 175-181.
- 478 **Hernández-Rodríguez, C. S., Ó. Marín, F. Calatayud, M. J. Mahiques, A. Mompó, I. Segura, E.**  
479 **Simó, and J. González-Cabrera. 2021.** Large-scale monitoring of resistance to coumaphos,  
480 amitraz, and pyrethroids in *Varroa destructor*. Insects 12(1): 27 doi:10.3390/insects12010027.

- 481 **Higes, M., R. Martín-Hernández, C. S. Hernández-Rodríguez, and J. González-Cabrera. 2020.**  
482 Assessing the resistance to acaricides in *Varroa destructor* from several Spanish locations.  
483 Parasitology Research 119(11): 3595-3601.
- 484 **Huang, Z. Y., G. Bian, Z. Xi, and X. Xie. 2019.** Genes important for survival or reproduction in *Varroa*  
485 *destructor* identified by RNAi. Insect science 26(1): 68-75.
- 486 **Jack, C. J., and J. D. Ellis. 2021.** Integrated pest management control of *Varroa destructor* (Acari:  
487 Varroidae), the most damaging pest of (*Apis mellifera* L.(Hymenoptera: Apidae)) colonies.  
488 Journal of Insect Science 21(5): 6 doi:10.1093/jisesa/ieab058.
- 489 **Kamler, M., M. Nesvorna, J. Stara, T. Erban, and J. Hubert. 2016.** Comparison of tau-fluvalinate,  
490 acrinathrin, and amitraz effects on susceptible and resistant populations of *Varroa destructor*  
491 in a vial test. Experimental and applied acarology 69(1): 1-9 doi:10.1007/s10493-016-0023-8.
- 492 **Kearse, M., R. Moir, A. Wilson, S. Stones-Havas, M. Cheung, S. Sturrock, S. Buxton, A. Cooper,**  
493 **S. Markowitz, and C. Duran. 2012.** Geneious Basic: an integrated and extendable desktop  
494 software platform for the organization and analysis of sequence data. Bioinformatics 28(12):  
495 1647-1649.
- 496 **Kim, D., B. Langmead, and S. L. Salzberg. 2015.** HISAT: a fast spliced aligner with low memory  
497 requirements. Nature Methods 12(4): 357-360.
- 498 **Krishnan, N., M. J. Hall, R. L. Hellmich, J. R. Coats, and S. P. Bradbury. 2021.** Evaluating toxicity  
499 of *Varroa* mite (*Varroa destructor*)-active dsRNA to monarch butterfly (*Danaus plexippus*)  
500 larvae. Plos One 16(6): e0251884 doi:10.1371/journal.pone.0251884.
- 501 **Kulhanek, K., N. Steinhauer, K. Rennich, D. M. Caron, R. R. Sagili, J. S. Pettis, J. D. Ellis, M. E.**  
502 **Wilson, J. T. Wilkes, D. R. Tapy, R. Rose, K. Lee, J. Rangel, and D. vanEngelsdorp. 2017.**  
503 A national survey of managed honey bee 2015–2016 annual colony losses in the USA. Journal  
504 of Apicultural Research 56(4): 328-340.
- 505 **Lester, P. J., A. Felden, J. W. Baty, M. Bulgarella, J. Haywood, A. N. Mortensen, E. J. Remnant,**  
506 **and Z. E. Smeele. 2022.** Viral communities in the parasite *Varroa destructor* and in colonies of  
507 their honey bee host (*Apis mellifera*) in New Zealand. Scientific reports 12(1): 12:8809  
508 doi:10.1038/s41598-022-12888-w.

- 509 **Maggi, M. D., S. R. Ruffinengo, L. B. Gende, M. J. Eguaras, and N. H. Sardella. 2008.** LC50 baseline  
510 levels of amitraz, coumaphos, fluvalinate and flumethrin in populations of *Varroa destructor*  
511 from Buenos Aires Province, Argentina. *Journal of Apicultural Research* 47(4): 292-295.
- 512 **Martin, S. J. 2004.** Acaricide (pyrethroid) resistance in *Varroa destructor*. *Bee World* 85(4): 67-69.
- 513 **Milani, N. 1995.** The resistance of *Varroa jacobsoni* Oud to pyrethroids: a laboratory assay. *Apidologie*  
514 26(5): 415-429.
- 515 **Millán-Leiva, A., Ó. Marín, K. Christmon, D. vanEngelsdorp, and J. González-Cabrera. 2021.**  
516 Mutations associated with pyrethroid resistance in *Varroa* mite, a parasite of honey bees, are  
517 widespread across the United States. *Pest management science* 77(7): 3241-3249.
- 518 **Mitton, G. A., F. Meroi Arcerito, H. Cooley, G. Fernández de Landa, M. J. Eguaras, S. R.**  
519 **Ruffinengo, and M. D. Maggi. 2022.** More than sixty years living with *Varroa destructor*: a  
520 review of acaricide resistance. *International journal of pest management* 68: 1-18  
521 doi:10.1080/09670874.2022.2094489.
- 522 **Mondet, F., A. Beaurepaire, A. McAfee, B. Locke, C. Alaux, S. Blanchard, B. Danka, and Y. Le**  
523 **Conte. 2020.** Honey bee survival mechanisms against the parasite *Varroa destructor*: a  
524 systematic review of phenotypic and genomic research efforts. *International Journal for*  
525 *Parasitology* 50(6-7): 433-447.
- 526 **MPI. New Zealand Legislation, Biosecurity Act 1993.** Ministry for Primary Industries 1993. Available  
527 at: <https://legislation.govt.nz/act/public/1993/0095/latest/DLM314623.html>. (Accessed 24  
528 February 2023)
- 529 **MPI.** Ministry for Primary Industries 2020 apiculture monitoring programme. Available at:  
530 <https://www.mpi.govt.nz/dmsdocument/44068-Apiculture-Moniotoring-Report-2020>.  
531 (Accessed 24 February 2023)
- 532 **Murphy, J. T., T. D. Breeze, B. Willcox, S. Kavanagh, and J. C. Stout. 2022.** Globalisation and  
533 pollinators: Pollinator declines are an economic threat to global food systems. *People and*  
534 *Nature* 4(3): 773-785.
- 535 **Narahashi, T. 2000.** Neuroreceptors and ion channels as the basis for drug action: past, present, and  
536 future. *Journal of Pharmacology and Experimental Therapeutics* 294(1): 1-26.
- 537 **R Development Core Team 2020.** R: a language and environment for statistical computing computer  
538 program, version By R Development Core Team, Vienna, Austria.



- 539 **Rademacher, E., M. Harz, and S. Schneider. 2017.** Effects of oxalic acid on *Apis mellifera*  
540 (Hymenoptera: Apidae). *Insects* 8(3): 84 doi:10.3390/insects8030084.
- 541 **Ramsey, S. D., R. Ochoa, G. Bauchan, C. Gulbranson, J. D. Mowery, A. Cohen, D. Lim, J. Joklik,**  
542 **J. M. Cicero, and J. D. Ellis. 2019.** *Varroa destructor* feeds primarily on honey bee fat body  
543 tissue and not hemolymph. *Proceedings of the National Academy of Sciences* 116(5): 1792-  
544 1801.
- 545 **Reilly, J., D. Artz, D. Biddinger, K. Bobiwash, N. Boyle, C. Brittain, J. Brokaw, J. Campbell, J.**  
546 **Daniels, and E. Elle. 2020.** Crop production in the USA is frequently limited by a lack of  
547 pollinators. *Proceedings of the Royal Society B* 287(1931): 20200922  
548 doi:10.1098/rspb.2020.0922.
- 549 **Rinkevich, F. D. 2020.** Detection of amitraz resistance and reduced treatment efficacy in the *Varroa*  
550 mite, *Varroa destructor*, within commercial beekeeping operations. *Plos One* 15(1): e0227264  
551 doi:10.1371/journal.pone.0227264.
- 552 **Rinkevich, F. D., Y. Du, and K. Dong. 2013.** Diversity and convergence of sodium channel mutations  
553 involved in resistance to pyrethroids. *Pesticide biochemistry and physiology* 106(3): 93-100.
- 554 **Rosenkranz, P., P. Aumeier, and B. Ziegelmann. 2010.** Biology and control of *Varroa destructor*.  
555 *Journal of Invertebrate Pathology* 103: S96-S119 doi:10.1016/j.jip.2009.07.016.
- 556 **Seitz, N., K. S. Traynor, N. Steinhauer, K. Rennich, M. E. Wilson, J. D. Ellis, R. Rose, D. R. Tarp,**  
557 **R. R. Sagili, and D. M. Caron. 2016.** A national survey of managed honey bee 2014–2015  
558 annual colony losses in the USA. *Journal of Apicultural Research* 54(4): 292-304.
- 559 **Spivak, M., and M. Gilliam. 1998.** Hygienic behaviour of honey bees and its application for control of  
560 brood diseases and *Varroa*: Part II. Studies on hygienic behaviour since the Rothenbuhler era.  
561 *Bee World* 79(4): 169-186.
- 562 **Stahlmann-Brown, P., and T. Robertson. 2021.** New Zealand Colony Loss Survey Report - 2021. Available  
563 at: [https://www.mpi.govt.nz/dmsdocument/50221-Report-on-the-2021-New-Zealand-Colony-](https://www.mpi.govt.nz/dmsdocument/50221-Report-on-the-2021-New-Zealand-Colony-Loss-Survey)  
564 [Loss-Survey](https://www.mpi.govt.nz/dmsdocument/50221-Report-on-the-2021-New-Zealand-Colony-Loss-Survey). (Accessed 24 February 2023)
- 565 **Stahlmann-Brown, P., T. Robertson, and O. Borowik. 2020.** Report on the 2020 New Zealand colony loss  
566 survey. Available at: [https://www.mpi.govt.nz/dmsdocument/44590-Report-on-the-2020-New-](https://www.mpi.govt.nz/dmsdocument/44590-Report-on-the-2020-New-Zealand-Colony-Loss-Survey)  
567 [Zealand-Colony-Loss-Survey](https://www.mpi.govt.nz/dmsdocument/44590-Report-on-the-2020-New-Zealand-Colony-Loss-Survey). (Accessed 24 February 2023)

- 568 **Stahlmann-Brown, P., R. J. Hall, H. Prager, and T. Robertson. 2022a.** Varroa appears to drive  
569 persistent increases in New Zealand colony losses. *Insects* 13(7): 589  
570 doi:10.3390/insects13070589.
- 571 **Stahlmann-Brown, P., R. J. Hall, R. Butt, B. McCall, G. Torres, and T. Wright. 2022b.** Valuing over-  
572 winter colony losses for New Zealand's commercial beekeepers. *New Zealand Economic*  
573 *Papers*: 1-7 doi:10.1080/00779954.2022.2146527.
- 574 **Steinhauer, N., D. Aurell, S. Bruckner, M. Wilson, K. Rennich, D. vanEngelsdorp, and G. Williams.**  
575 United States honey bee colony losses 2020-2021. Available at:  
576 [https://beeinformed.org/2021/06/21/united-states-honey-bee-colony-losses-2020-2021-](https://beeinformed.org/2021/06/21/united-states-honey-bee-colony-losses-2020-2021-preliminary-results)  
577 [preliminary-results](https://beeinformed.org/2021/06/21/united-states-honey-bee-colony-losses-2020-2021-preliminary-results). (Accessed 24 February 2023)
- 578 **Tan, J., S. L. Levine, P. M. Bachman, P. D. Jensen, G. M. Mueller, J. P. Uffman, C. Meng, Z. Song,**  
579 **K. B. Richards, and M. H. Beevers. 2016.** No impact of DvSnf7 RNA on honey bee (*Apis*  
580 *mellifera* L.) adults and larvae in dietary feeding tests. *Environmental toxicology and chemistry*  
581 35(2): 287-294.
- 582 **Thompson, H. M., M. A. Brown, R. F. Ball, and M. H. Bew. 2002.** First report of *Varroa destructor*  
583 resistance to pyrethroids in the UK. *Apidologie* 33(4): 357-366.
- 584 **Tihelka, E. 2018.** Effects of synthetic and organic acaricides on honey bee health: A review. *Slovenian*  
585 *Veterinary Research* 55(3): 119-140.
- 586 **Traynor, K. S., F. Mondet, J. R. de Miranda, M. Techer, V. Kowallik, M. A. Y. Oddie, P.**  
587 **Chantawannakul, and A. McAfee. 2020.** *Varroa destructor*. A complex parasite, crippling  
588 honey bees worldwide. *Trends in Parasitology* 36(7): 592-606.
- 589 **van Alphen, J. J., and B. J. Fernhout. 2020.** Natural selection, selective breeding, and the evolution  
590 of resistance of honeybees (*Apis mellifera*) against Varroa. *Zoological letters* 6: 6  
591 doi:10.1186/s40851-020-00158-4.
- 592 **van der Zee, R., L. Pisa, S. Andonov, R. Brodschneider, J.-D. Charriere, R. Chlebo, M. F. Coffey,**  
593 **K. Crailsheim, B. Dahle, and A. Gajda. 2012.** Managed honey bee colony losses in Canada,  
594 China, Europe, Israel and Turkey, for the winters of 2008–9 and 2009–10. *Journal of Apicultural*  
595 *Research* 51(1): 100-114.
- 596 **van der Zee, R., A. Gray, C. Holzmann, L. Pisa, R. Brodschneider, R. Chlebo, M. F. Coffey, A.**  
597 **Kence, P. Kristiansen, and F. Mutinelli. 2013.** Standard survey methods for estimating colony

598            losses and explanatory risk factors in *Apis mellifera*. Journal of Apicultural Research 52(4): 1-  
599            36 doi:10.3896/IBRA.1.52.4.18.

600    **Vanbergen, A. J., and Insect Pollinators Initiative. 2013.** Threats to an ecosystem service: pressures  
601            on pollinators. Frontiers in Ecology and the Environment 11(5): 251-259.

602    **vanEngelsdorp, D., J. Hayes Jr, R. M. Underwood, and J. Pettis. 2008.** A survey of honey bee  
603            colony losses in the US, fall 2007 to spring 2008. Plos One 3(12): e4071  
604            doi:10.1371/journal.pone.0004071.

605    **Wang, R., Z. Y. Huang, and K. Dong. 2003.** Molecular characterization of an arachnid sodium channel  
606            gene from the varroa mite (*Varroa destructor*). Insect Biochemistry and Molecular Biology 33(7):  
607            733-739.

608    **Wilfert, L., G. Long, H. C. Leggett, P. Schmid-Hempel, R. Butlin, S. J. M. Martin, and M. Boots.**  
609            **2016.** Deformed wing virus is a recent global epidemic in honeybees driven by *Varroa* mites.  
610            Science 351(6273): 594-597.

611
