# Supplementary material for: Are increasing honey bee colony losses attributed to Varroa destructor in New Zealand driven by miticide resistance?
Source: bioRxiv or medRxiv preprint supplement (doi:10.1101/2023.03.22.533871), 2023-03-24
Supplement: Supplementary file [file media-1.pdf]

## Supplemental material

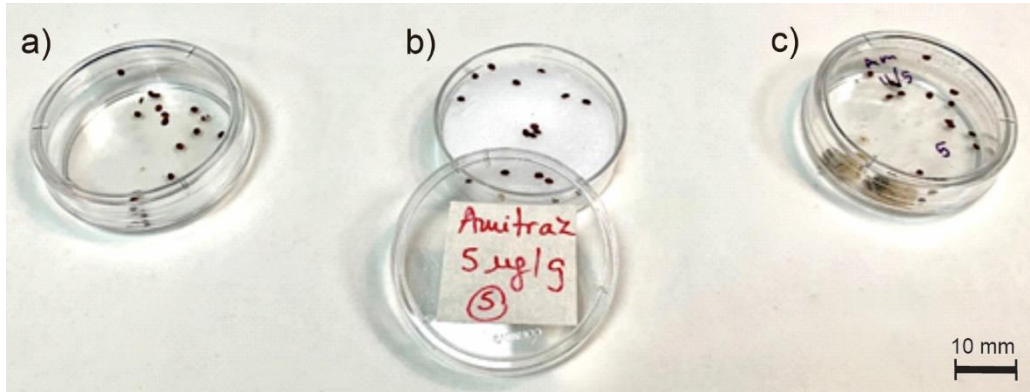

Figure S1. Experimental setup testing the effects of pesticide concentration on *Varroa* survival. a) 20 mites in a petri dish awaiting treatment, b) mites transferred to petri dish containing the treatment for an hour and c) mites in a new petri dish following exposure to the treatment with bee pupae for 48 hours, followed by a survival assessment. Photo credit: Phil Lester.

Supp. Table 1. Ten individual *Varroa destructor* mites from throughout New Zealand were sequenced in this study. We examined the samples for mutations in nucleotides 1710-1712 (amino acid position 925) of the coding region of the voltage-gated sodium channel (Na) gene (GenBank accession number KC152655) as determined in González-Cabrera et al. (2016). All our sequences presented the wild type allele.

| Sample ID | Location                    | Sanger sequences using the Vd_L925V_F primer (nucleotides 1710-1712 are highlighted in red, and the Vd_L925_R primer binding region is highlighted in green). |
|-----------|-----------------------------|---------------------------------------------------------------------------------------------------------------------------------------------------------------|
| 1         | Hamilton (Matangi, Waikato) | ACGATAGGAGCTCTGGGTAACCTGACCTTGTGTTGGGAATTATCA<br>TCTT                                                                                                         |
| 2         | Tamahere (Waikato)          | ACGATAGGAGCTCTGGGTAACCTGACCTTGTGTTGGGAATTATCA<br>TCTT                                                                                                         |
| 3         | Horotiu (Waikato)           | ACGATAGGAGCTCTGGGTAACCTGACCTTGTGTTGGGAATTATCA<br>TCTT                                                                                                         |
| 4         | Enderly (Waikato)           | ACGATAGGAGCTCTGGGTAACCTGACCTTGTGTTGGGAATTATCA<br>TCTT                                                                                                         |
| 5         | Ōtaki (Kapiti)              | ACGATAGGAGCTCTGGGTAACCTGACCTTGTGTTGGGAATTATCA<br>TCTT                                                                                                         |
| 6         | Kelburn (Wellington)        | ACGATAGGAGCTCTGGGTAACCTGACCTTGTGTTGGGAATTATCA<br>TCTT                                                                                                         |
| 7         | Vogeltown (Wellington)      | ACGATAGGAGCTCTGGGTAACCTGACCTTGTGTTGGGAATTATCA<br>TCTT                                                                                                         |
| 8         | Ashburton (Canterbury)      | ACGATAGGAGCTCTGGGTAACCTGACCTTGTGTTGGGAATTATCA<br>TCTT                                                                                                         |
| 9         | Ashburton (Canterbury)      | ACGATAGGAGCTCTGGGTAACCTGACCTTGTGTTGGGAATTATCA<br>TCTT                                                                                                         |
| 10        | Ashburton (Canterbury)      | ACGATAGGAGCTCTGGGTAACCTGACCTTGTGTTGGGAATTATCA<br>TCTT                                                                                                         |
